# Supplementary figures and images for: Diagnostic performance of electrocardiographic criteria in echocardiographic diagnosis of different patterns of left ventricular hypertrophy
Source: PubMed Central journal article supplement — Ann Noninvasive Electrocardiol. 2019 Nov 14;25(3):e12728. doi: 10.1111/anec.12728 (PMC7358819; doi:10.1111/anec.12728), 2019-11-14

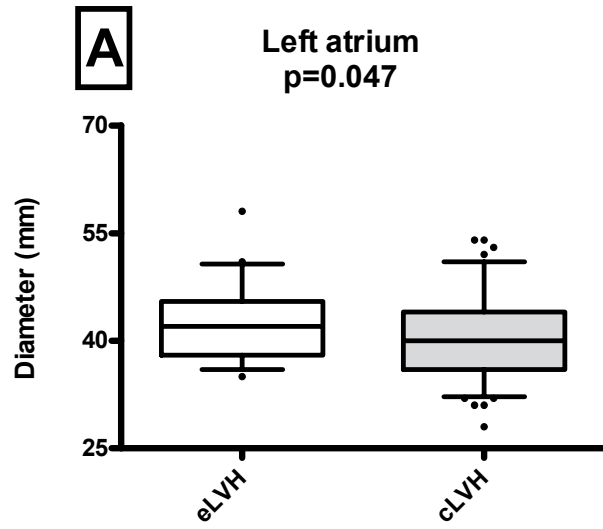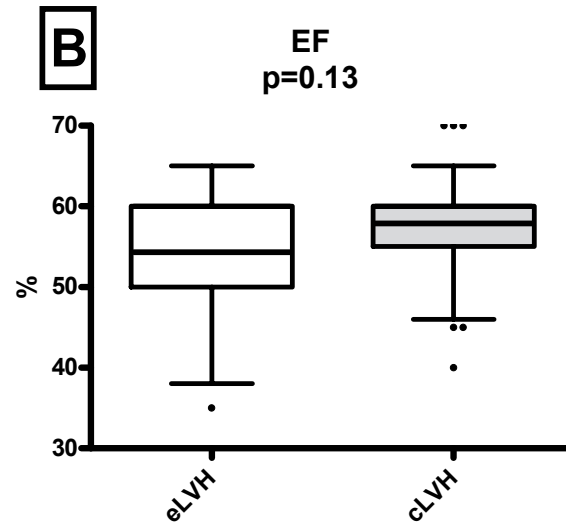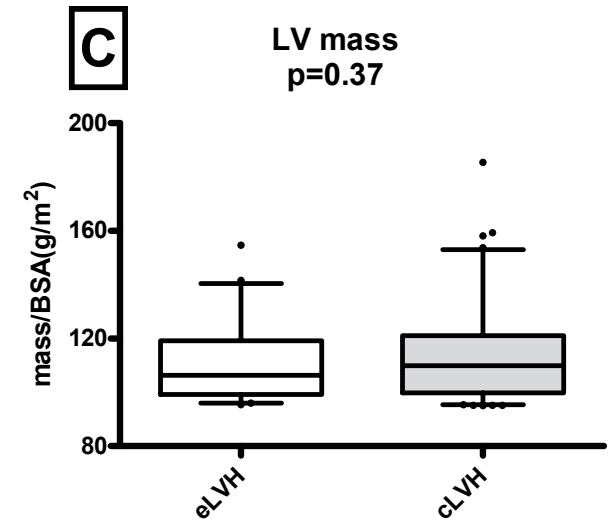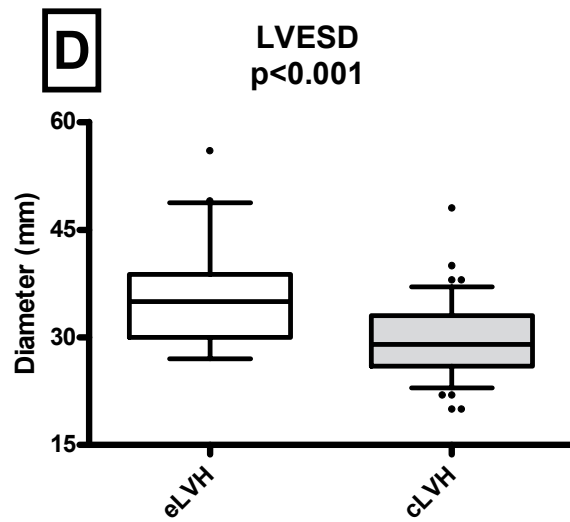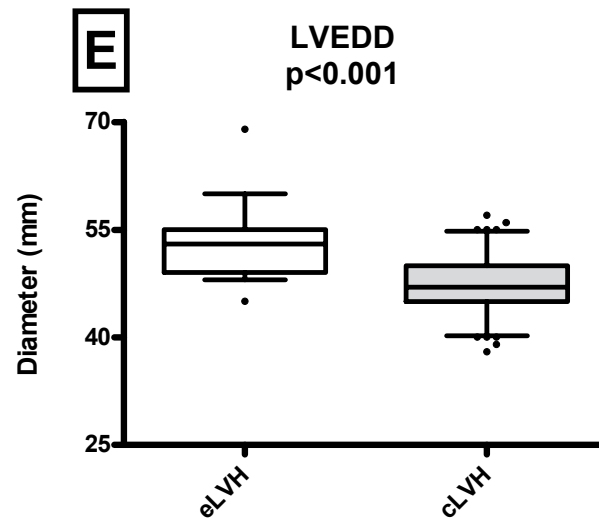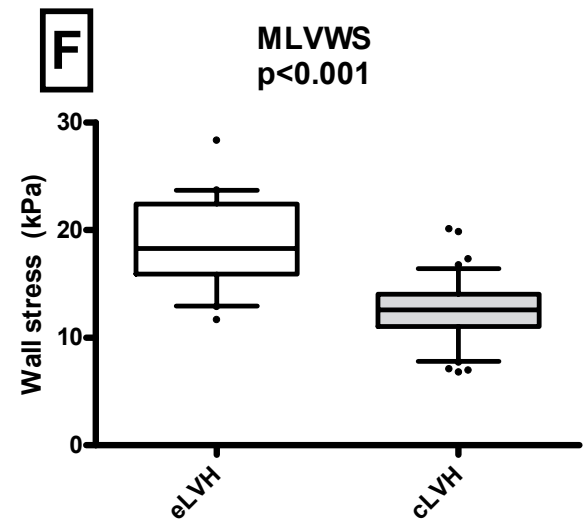

Supplement: ANEC-25-e12728-s001.pdf [file ANEC-25-e12728-s001.pdf]
